# Supplementary material for: IGenomic answers for children: Dynamic analyses of >1000 pediatric rare disease genomes
Source: bioRxiv or medRxiv preprint supplement (doi:10.1101/2021.10.07.21264628), 2021-10-12
Supplement: Supplementary file [file media-2.pdf]

# Supplemental Figures

**Genomic answers for children: Dynamic analyses of >1000 pediatric rare disease genomes**

**Supplemental Figure S1.** Family of 239. **(a)** Pedigree illustrating the two siblings, who were referred for familial lipodystrophy; clinical exome sequencing was nondiagnostic. **(b)** Research reanalysis revealed a homozygous missense variant in *MFN2*: c.2119C>T (p.Arg707Trp), associated with multiple symmetric lipomatosis, representing a phenotypic expansion of the disease.

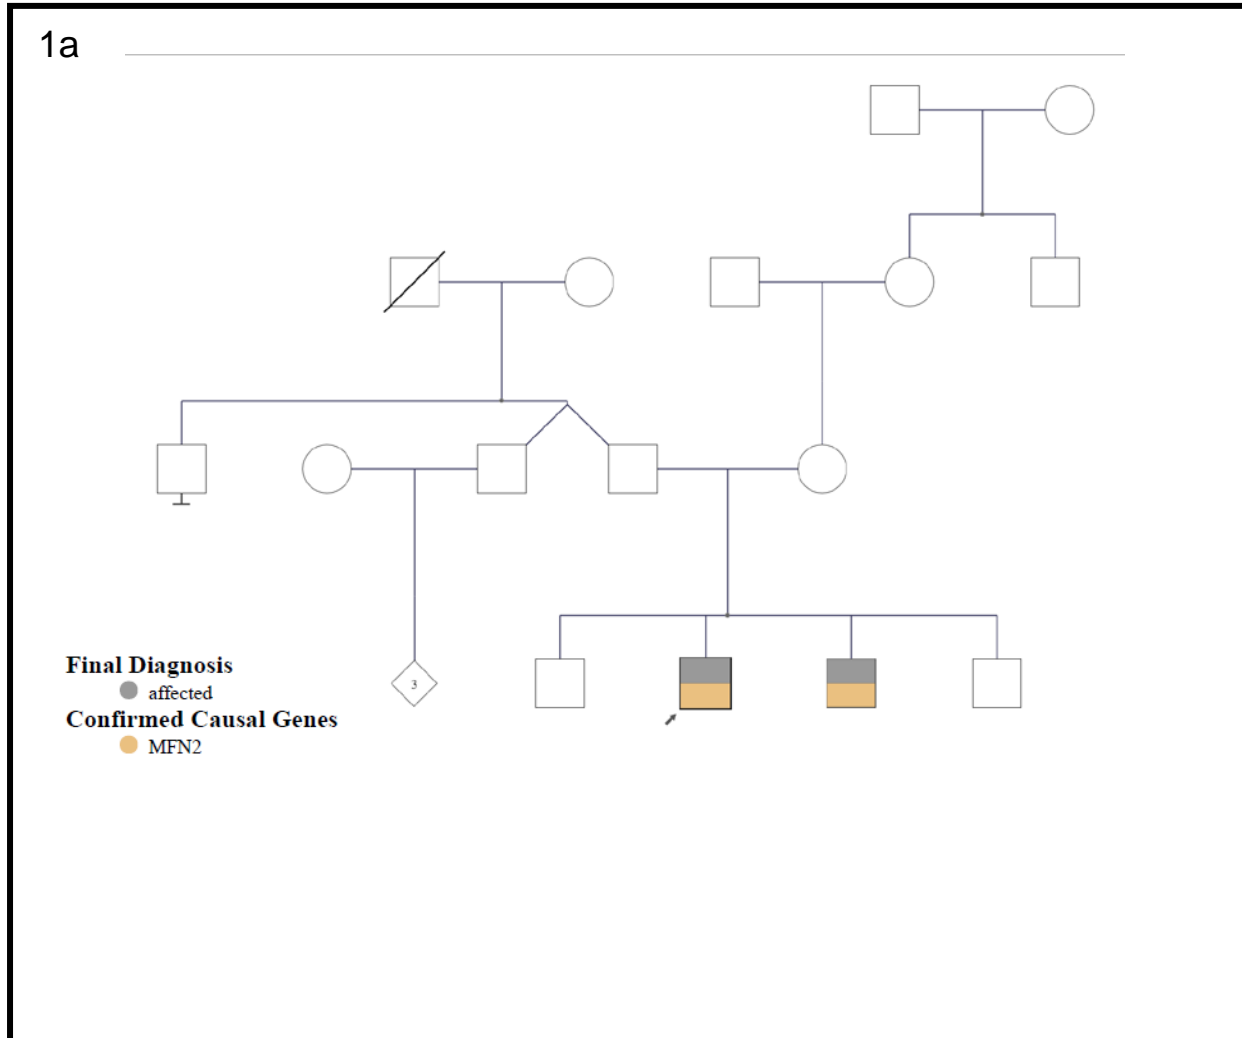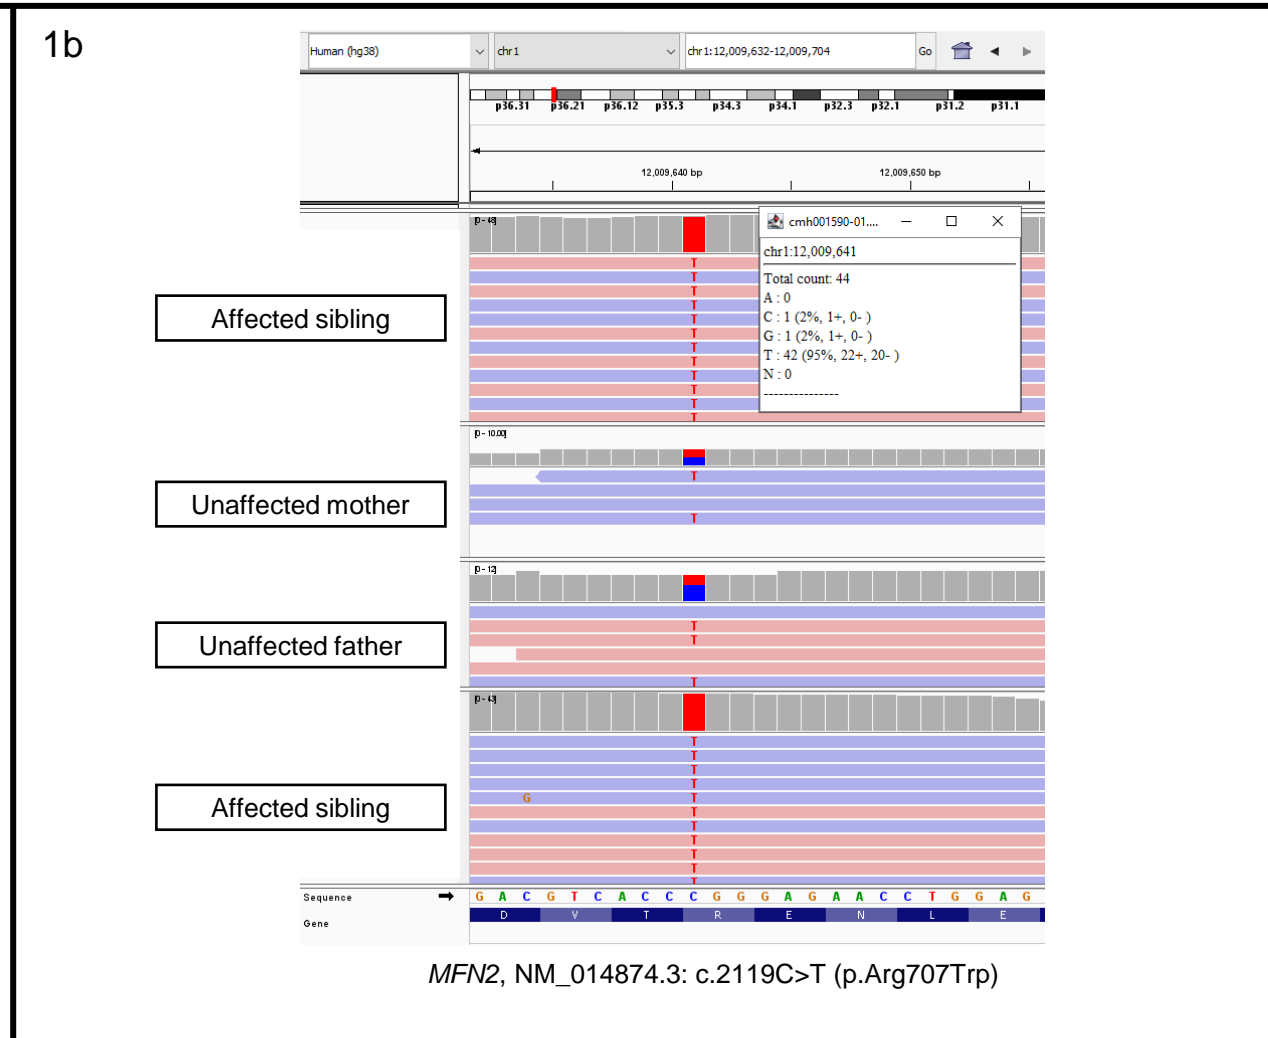

**Supplemental Figure S2.** Family of 453. **(a)** Pedigree illustrating the proband who was referred for myotonia congenita, and significant family history of disease. Clinical panel testing was negative. **(b)** Research testing revealed a known pathogenic variant in *SCN4A*, c.4342C>T (p.Arg1448Cys), associated with paramyotonia congenita. Follow-up communication revealed that the variant had not meet quality metrics in the original send-out testing and had not been reported, illustrating the importance of coverage and test-specific limitations stated by the laboratory.

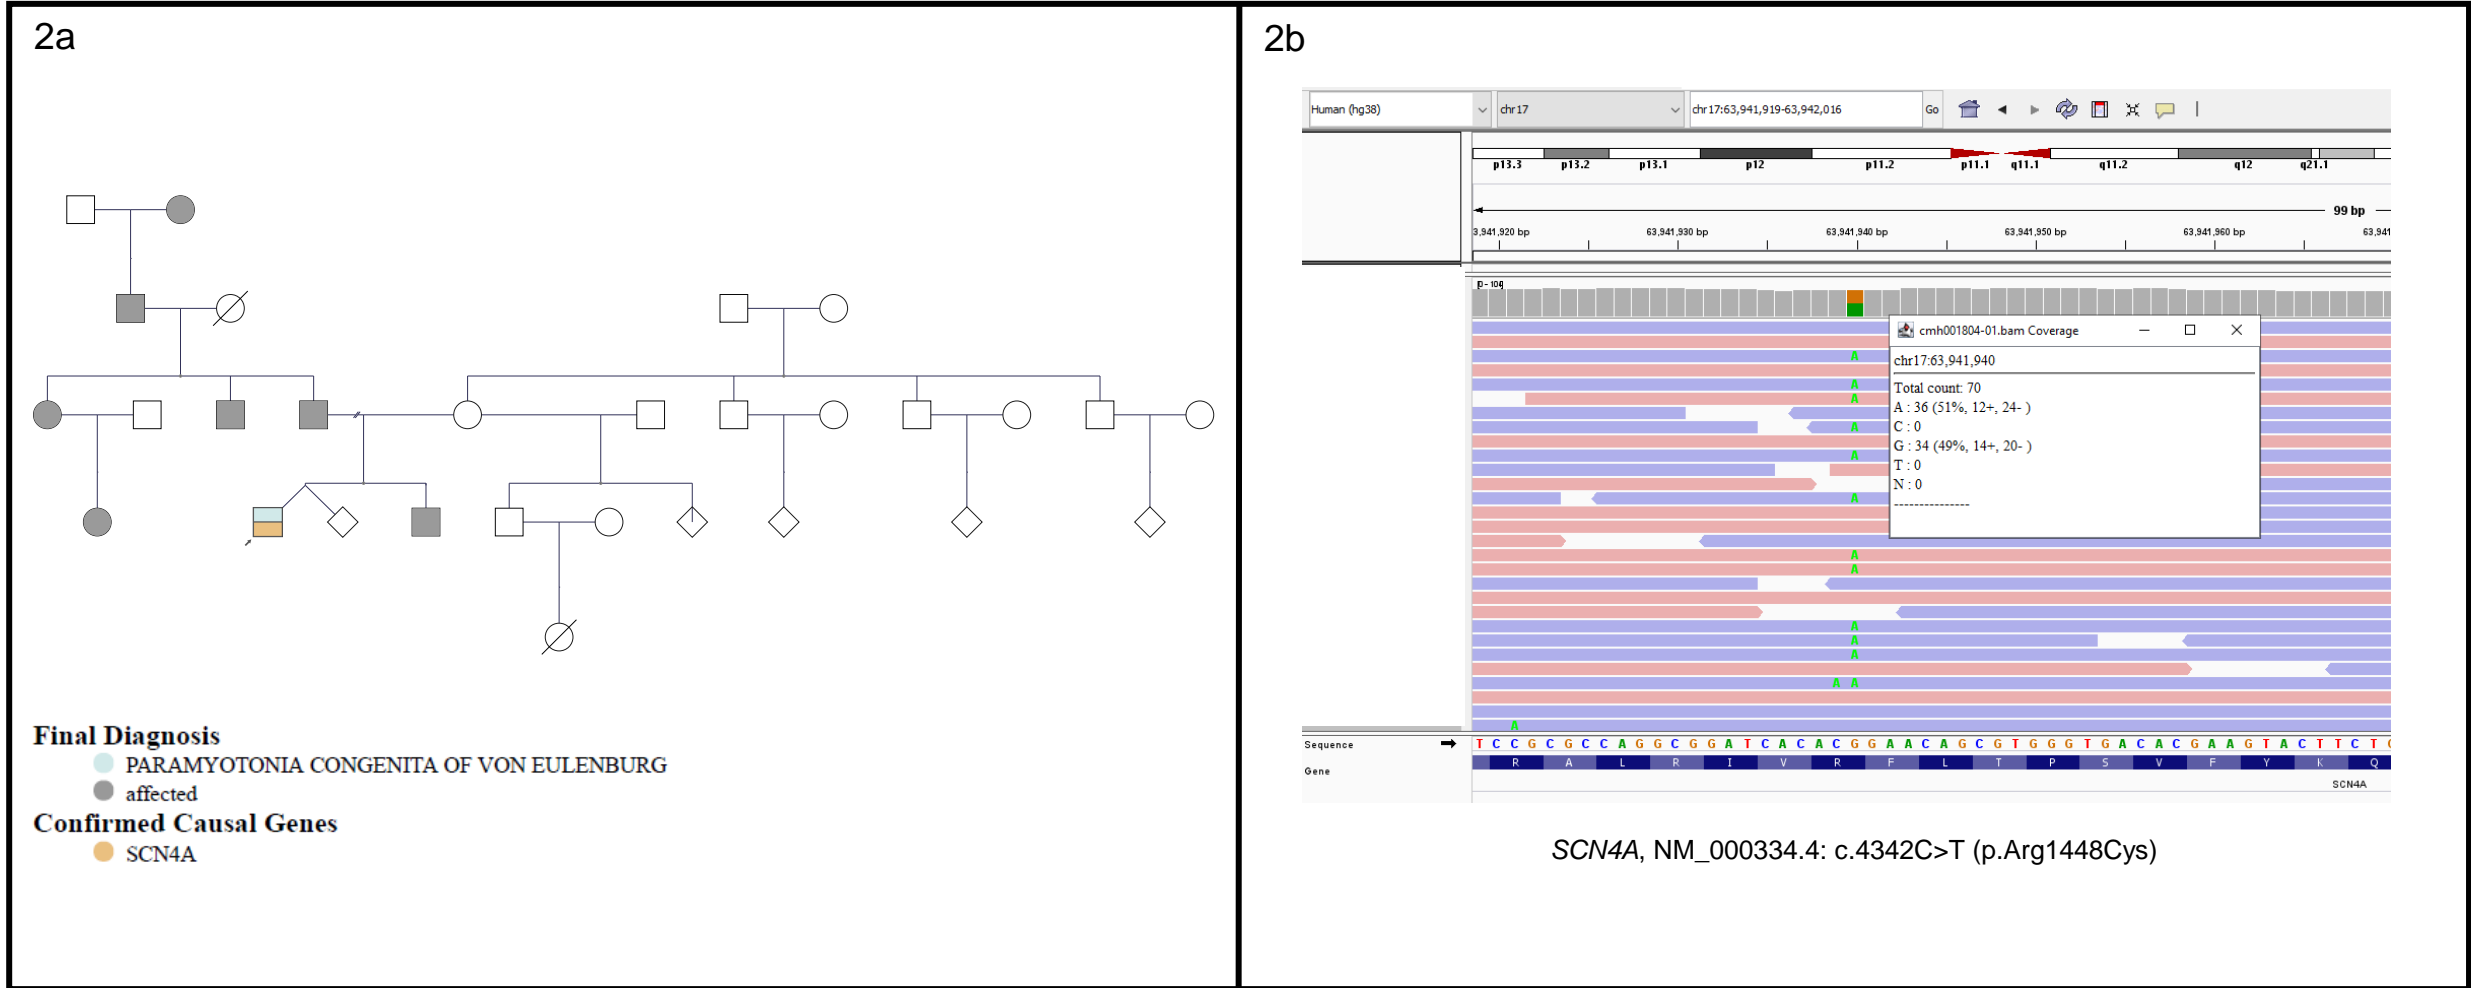

**Supplemental Figure S3.** Small copy number variants involving single exons that remain challenging to detect. **(a)** Pedigree of family of 129 proband who was referred for profound congenital hypotonia, with negative clinical testing. **(b)** Exome sequencing revealed a maternally inherited premature stop variant in *TBCK*:c.1039C>T(p.Arg347Ter), however a second variant was not identified. **(c)** Subsequent genome sequencing revealed a recurrent, paternally inherited deletion of exon 3 in *TBCK*: c.2060-6793\_2235+426del (p.GLU687Valfs\*8), consistent with a diagnosis of infantile hypotonia with psychomotor retardation and characteristic facies 3 (OMIM 616900). **(d)** Pedigree of family of 305 proband who was also referred for profound congenital hypotonia, with prior negative clinical testing. **(e)** Genome sequencing revealed homozygosity for the recurrent exon 23 deletion in *TBCK*, confirming the diagnosis of infantile hypotonia with psychomotor retardation and characteristic facies 3.

3a

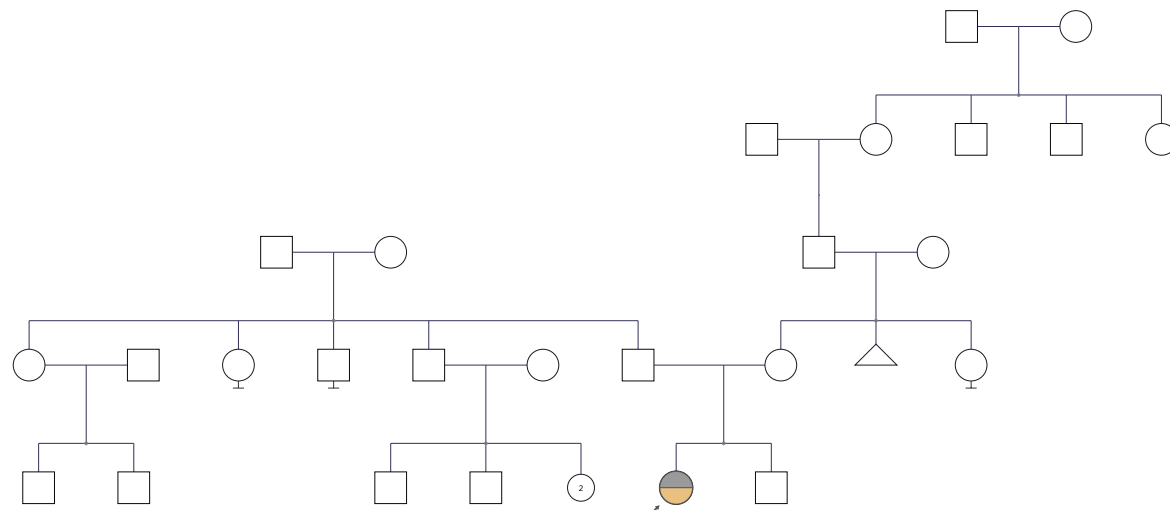

**Final Diagnosis**

● affected

**Confirmed Causal Genes**

● TBCK

3b

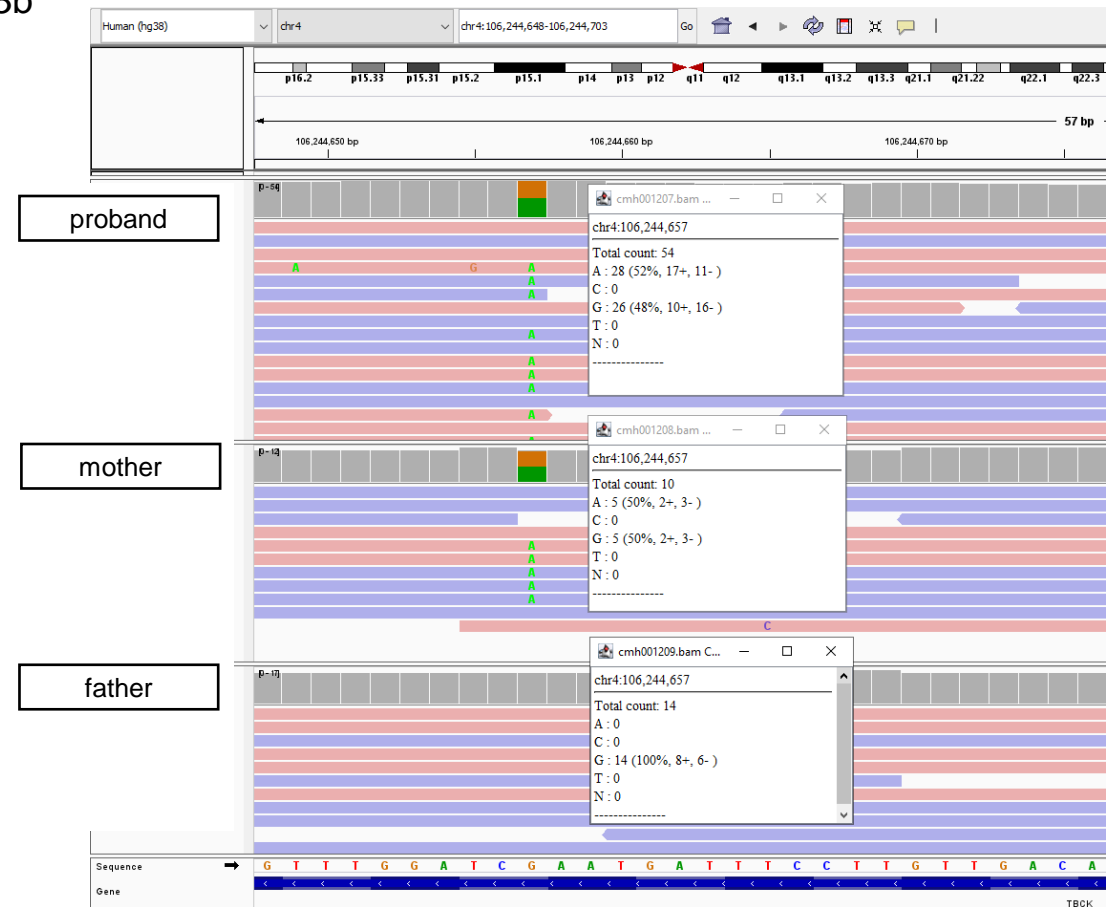

**Supplemental Figure S3.** Small copy number variants involving single exons that remain challenging to detect. **(a)** Pedigree of family of 129 proband who was referred for profound congenital hypotonia, with negative clinical testing. **(b)** Exome sequencing revealed a maternally inherited premature stop variant in *TBCK*:c.1039C>T(p.Arg347Ter), however a second variant was not identified. **(c)** Subsequent genome sequencing revealed a recurrent, paternally inherited deletion of exon 3 in *TBCK*: c.2060-6793\_2235+426del (p.Glu687Valfs\*8), consistent with a diagnosis of infantile hypotonia with psychomotor retardation and characteristic facies 3 (OMIM 616900). **(d)** Pedigree of family of 305 proband who was also referred for profound congenital hypotonia, with prior negative clinical testing. **(e)** Genome sequencing revealed homozygosity for the recurrent exon 23 deletion in *TBCK*, confirming the diagnosis of infantile hypotonia with psychomotor retardation and characteristic facies 3.

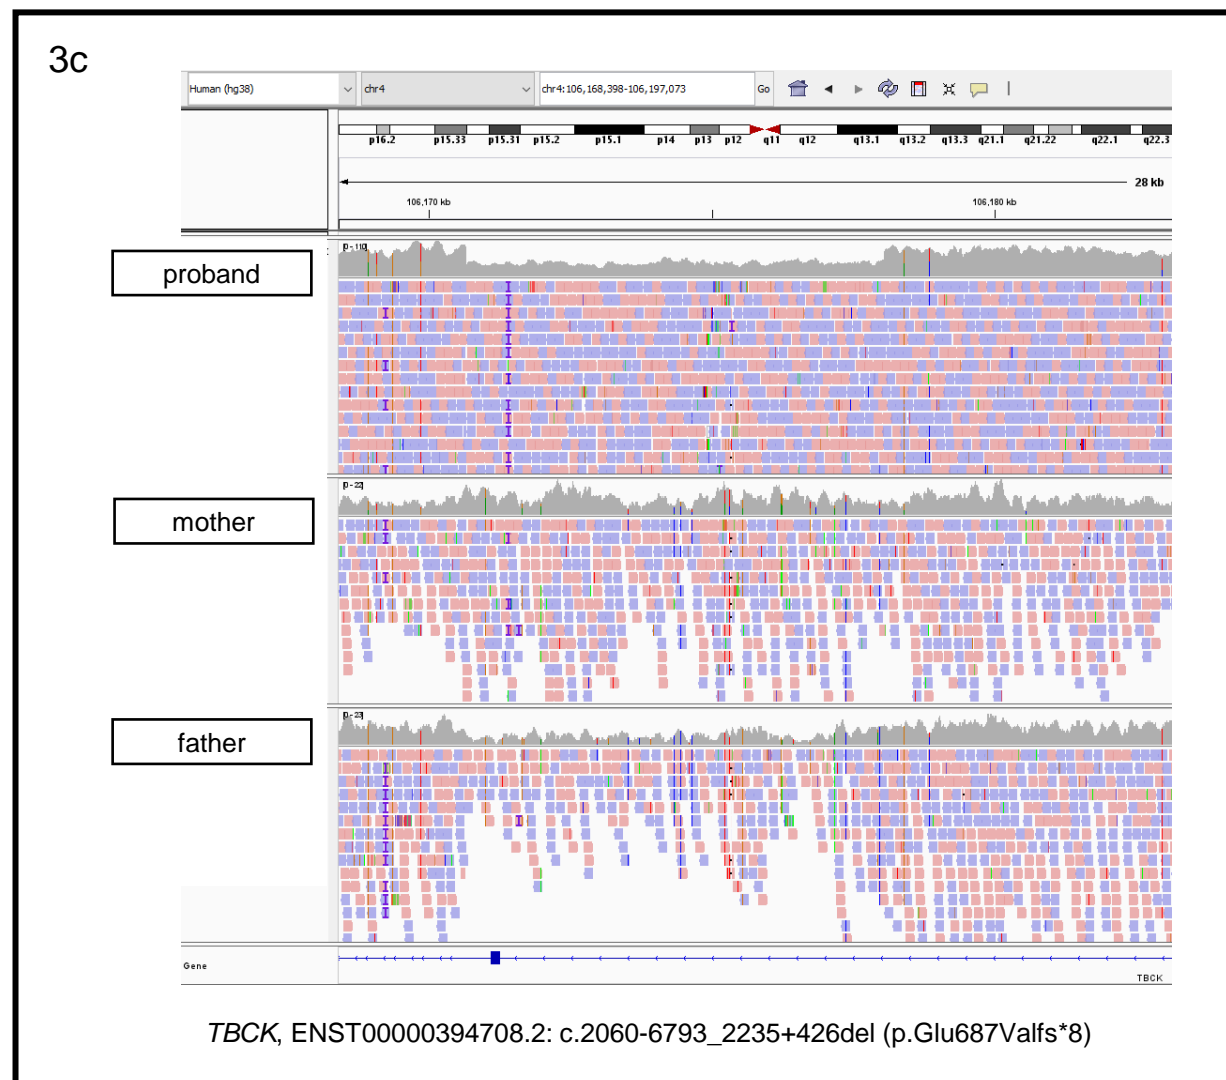



**Supplemental Figure S4:** Family of 302. **(a)** Pedigree of proband who was referred due to multiple affected siblings with immunodeficiency, small growth, small hands and feet, and variable developmental delays. **(b)** Clinical testing revealed a paternally-inherited premature stop variant in *SPECC1L*: c.1900C>T (p.Arg634Ter), which did not explain the full phenotype of the siblings (OMIM 614140). **(c)** Subsequent genome sequencing revealed a second diagnosis of Roiffman syndrome, an autosomal recessive disorder caused by variants in *RNU4ATAC* which encodes a non-coding RNA not covered by exome testing.

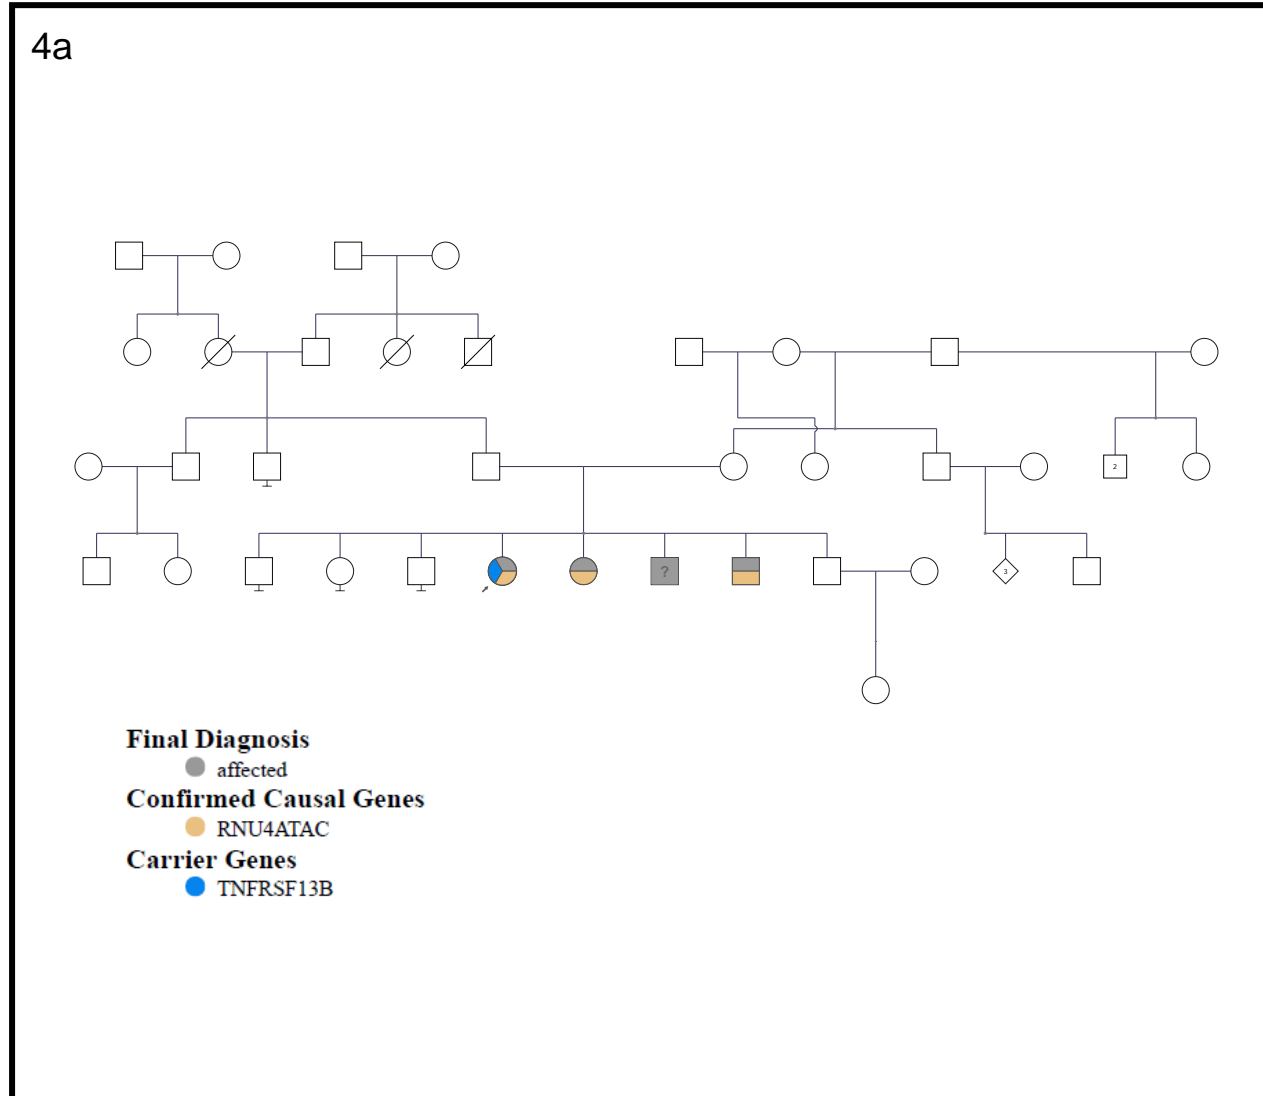

**Supplemental Figure S4: Family of 302. (a)** Pedigree of proband who was referred due to multiple affected siblings with immunodeficiency, small growth, small hands and feet, and variable developmental delays. **(b)** Clinical testing revealed a paternally-inherited premature stop variant in *SPECC1L*: c.1900C>T (p.Arg634Ter), which did not explain the full phenotype of the siblings (OMIM 614140). **(c)** Subsequent genome sequencing revealed a second diagnosis of Roiffman syndrome, an autosomal recessive disorder caused by variants in *RNU4ATAC* which encodes a non-coding RNA not covered by exome testing.

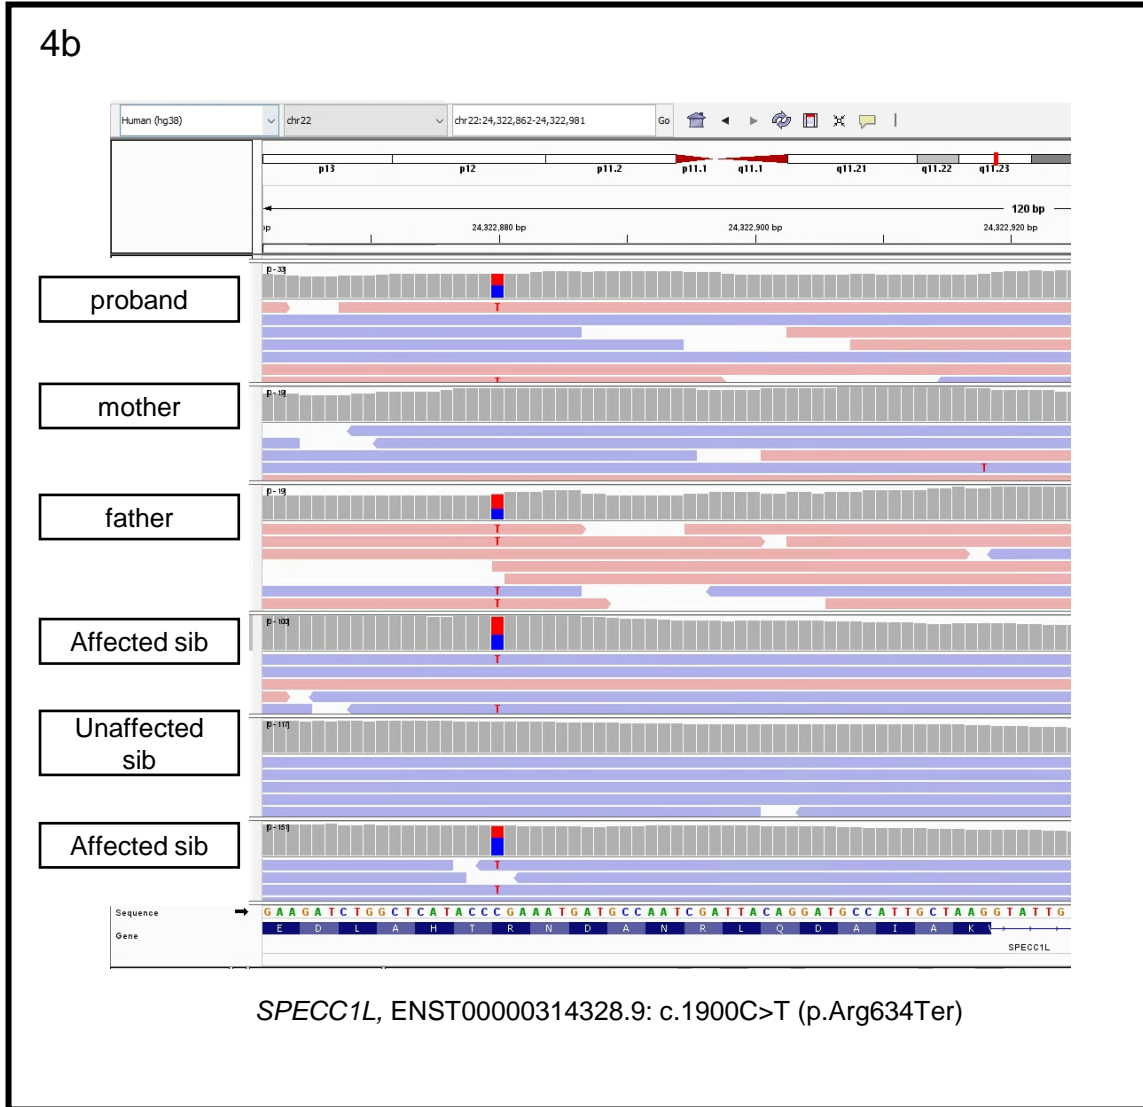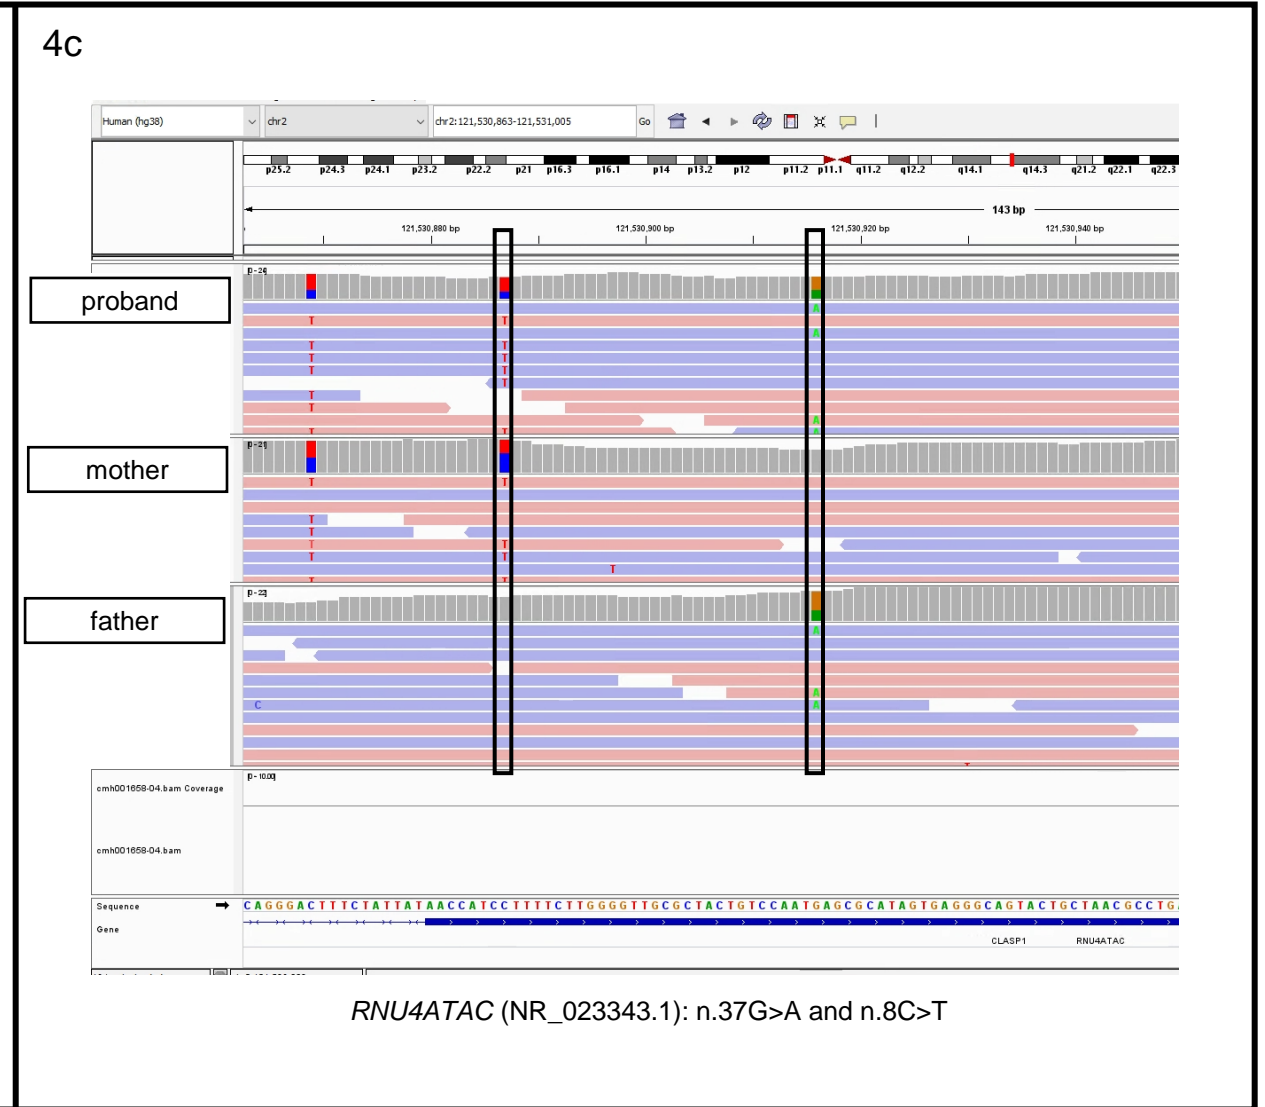



**Supplemental Figure S5. Family of 397. (a)** Pedigree illustrating the proband and his male sibling, who both had a clinical presentation of Becker muscular dystrophy **(b)** Previously completed research testing had identified a deep intronic variant in *DMD*, only covered by genome sequencing. Additional functional studies (data not shown) demonstrated that the variant creates an alternative splice site (predicted to result in inclusion of a pseudoexon 43), leading to disease.

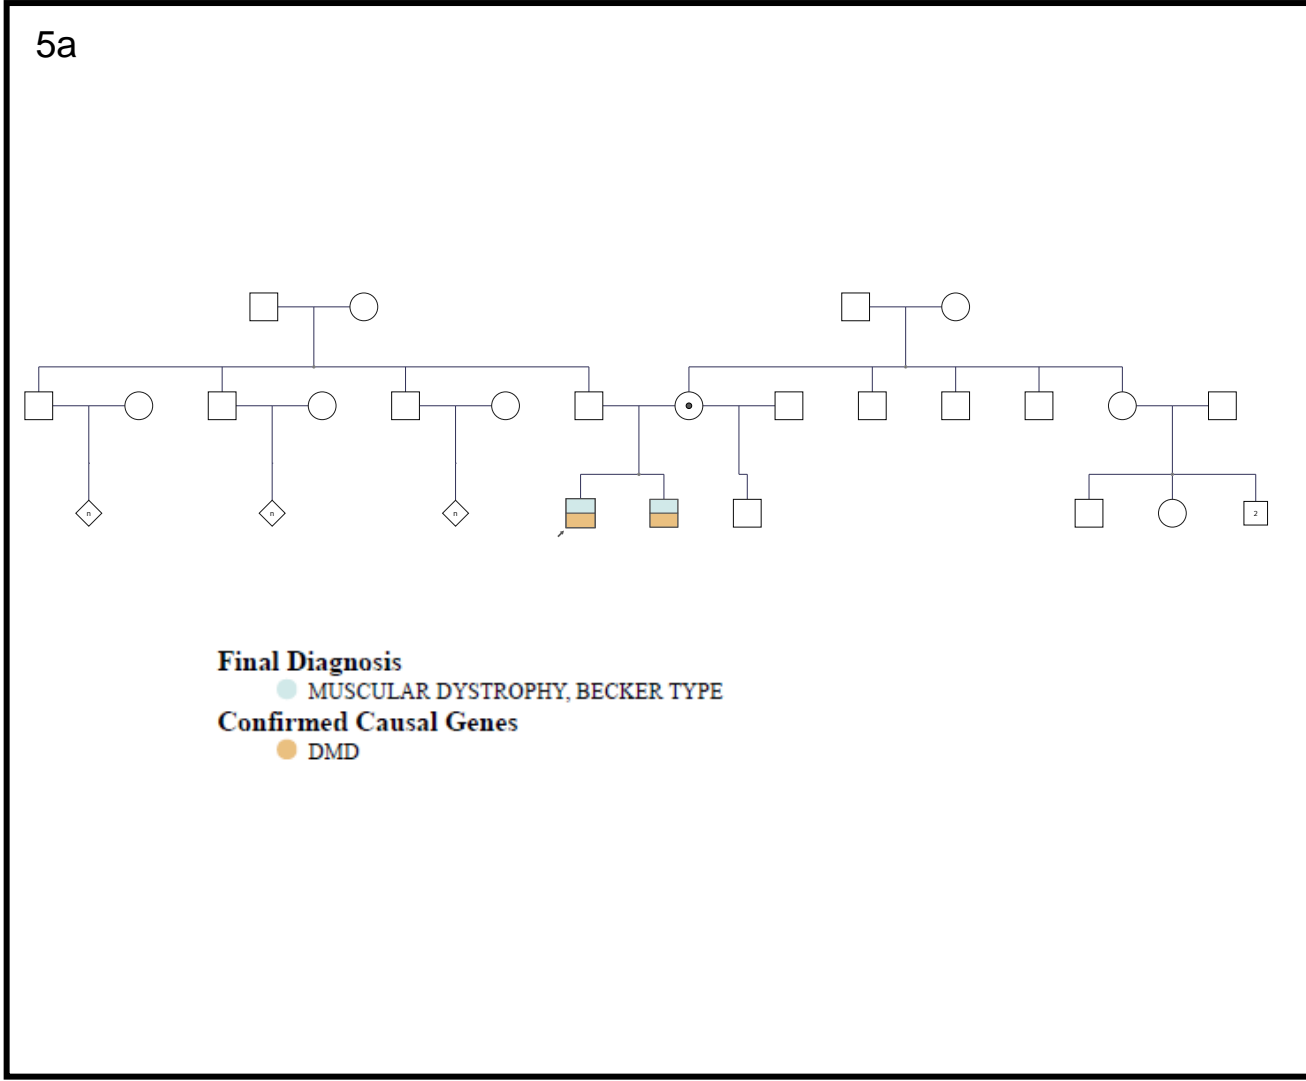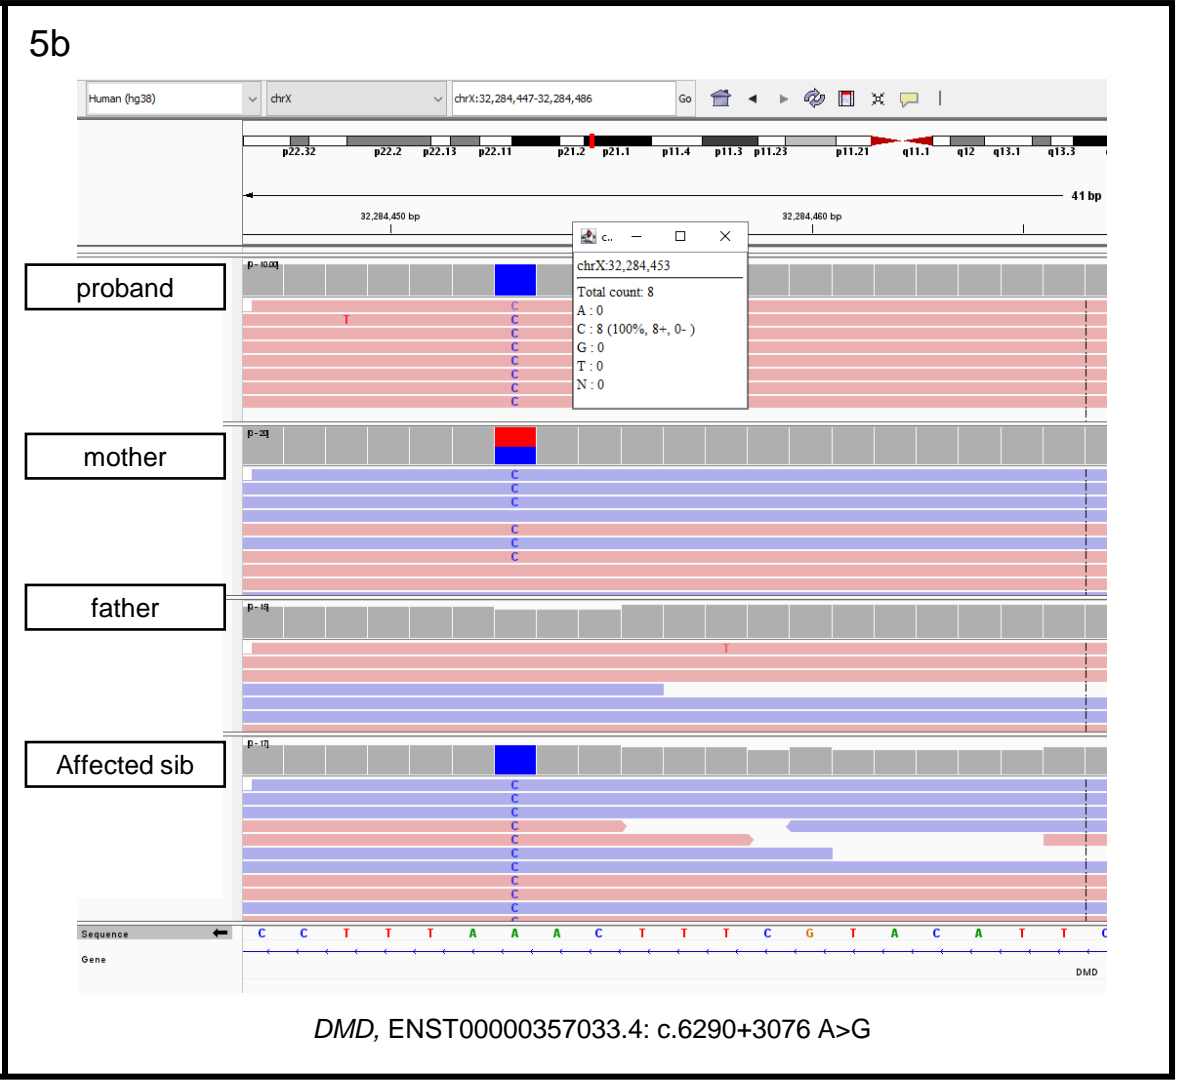

**Supplemental Figure S6.** Family of 451. **(a)** Pedigree illustrating proband who was diagnosed prenatally due to multiple anomalies with a maternally-inherited pathogenic duplication of 1.73 Mb at 1q21.1q21.2. **(b)** Subsequent research analysis (and E/A prioritization) identified a second diagnostic finding: a maternally-inherited pathogenic variant in *GATA4*: c.889G>A (p.Gly297Ser), associated with congenital heart defects

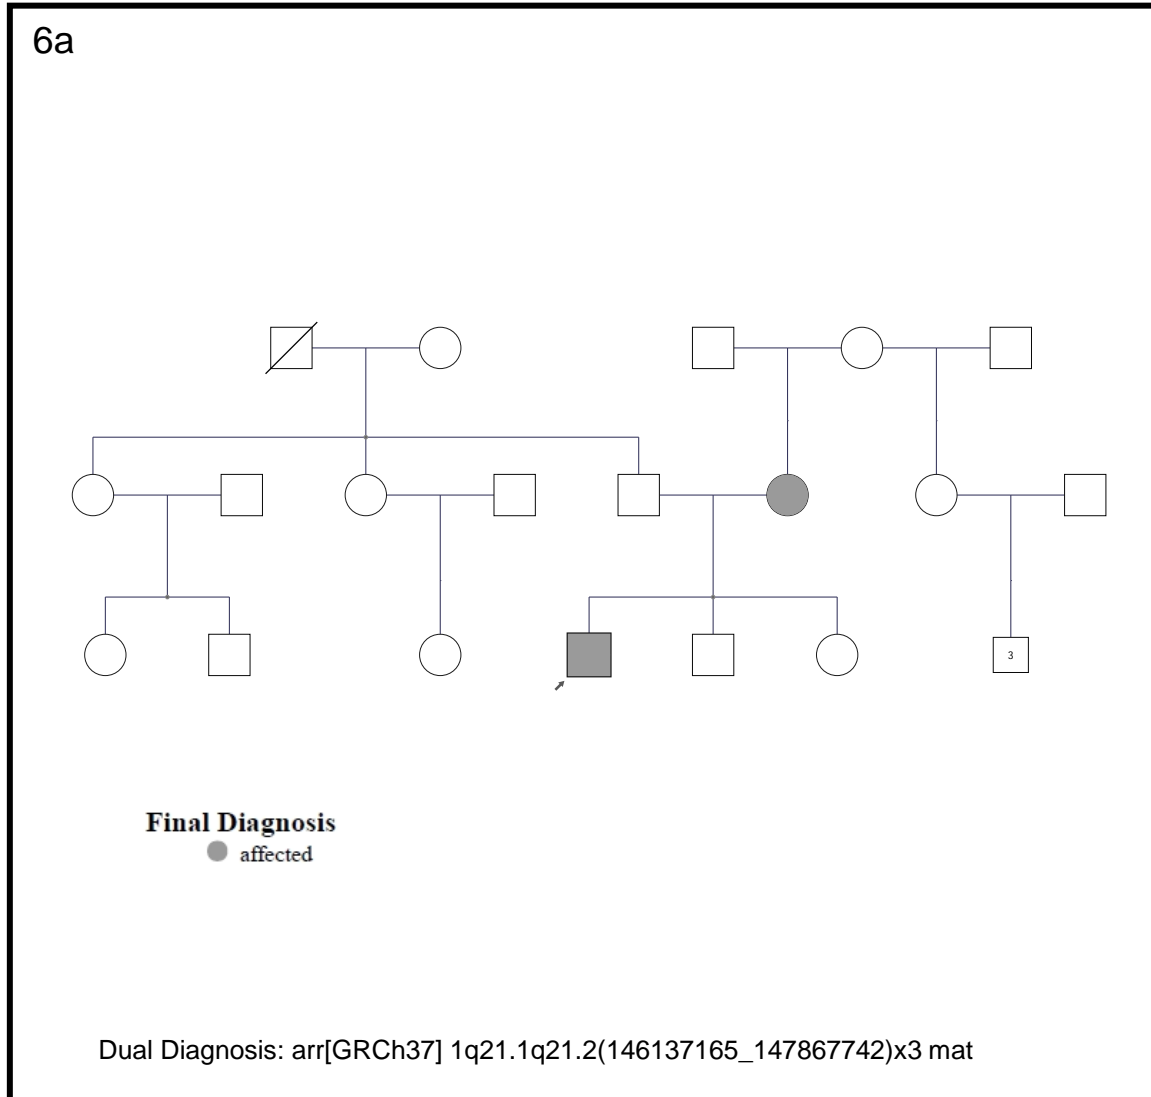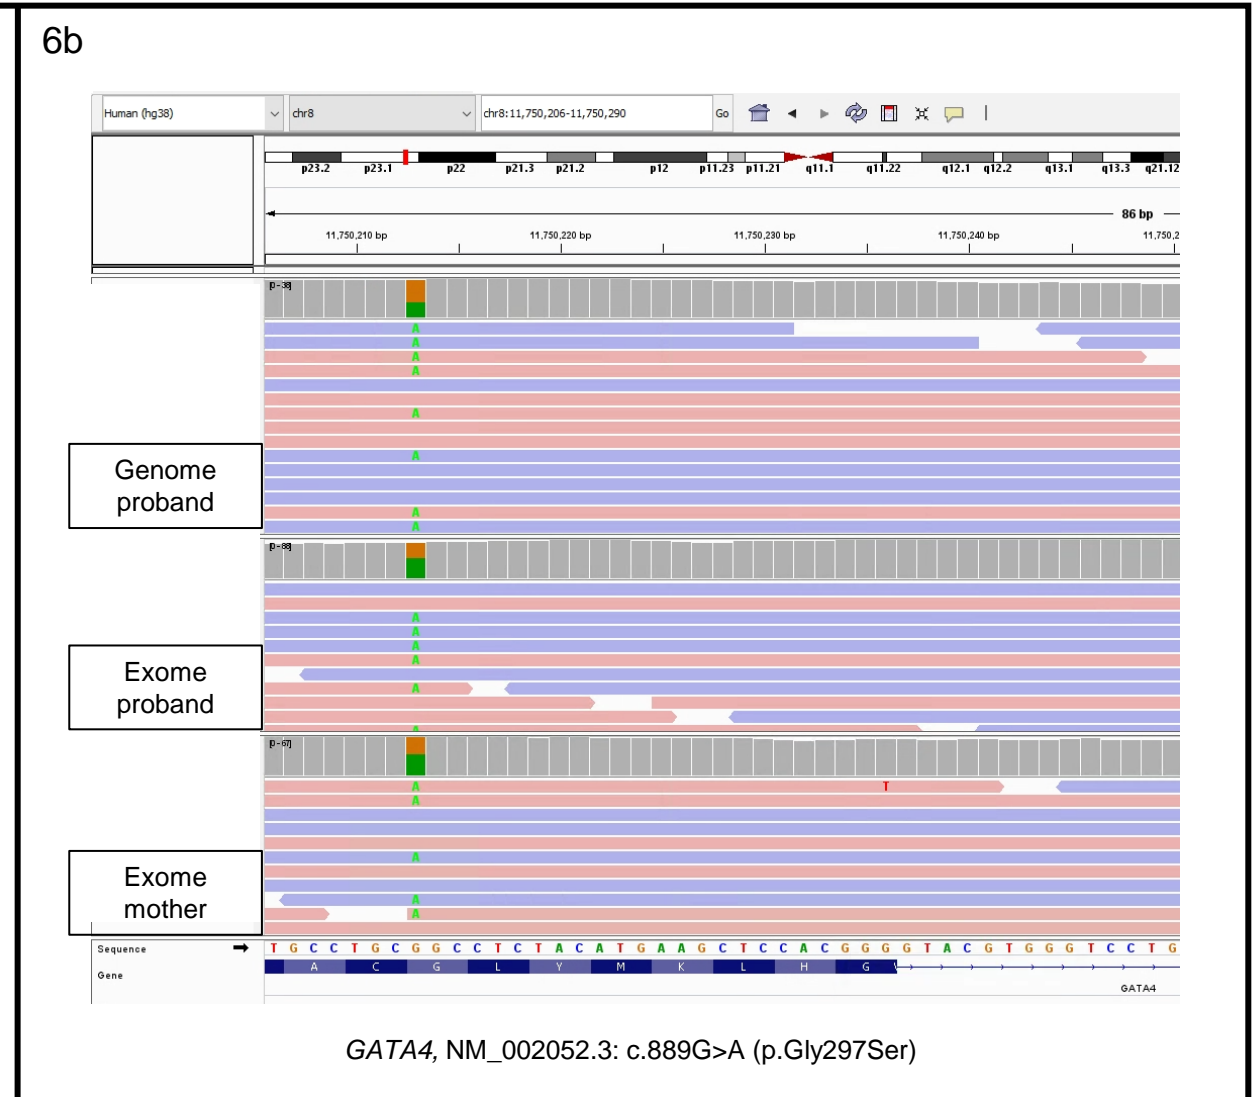

**Supplemental Figure S7.** Family of 678. (a) Pedigree of family 678 who was referred for lissencephaly and mild intellectual disability with a negative family history. (b) Initial testing using 10X linked read genome sequencing was non-diagnostic; however, subsequent sequencing using PacBio HiFi reads revealed a heterozygous known pathogenic variant in *CEP85L*: c.3G>T (p.Met1?), associated with autosomal dominant lissencephaly.

7a

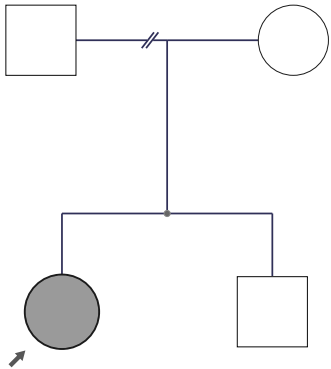

**Final Diagnosis**  
● affected

7b

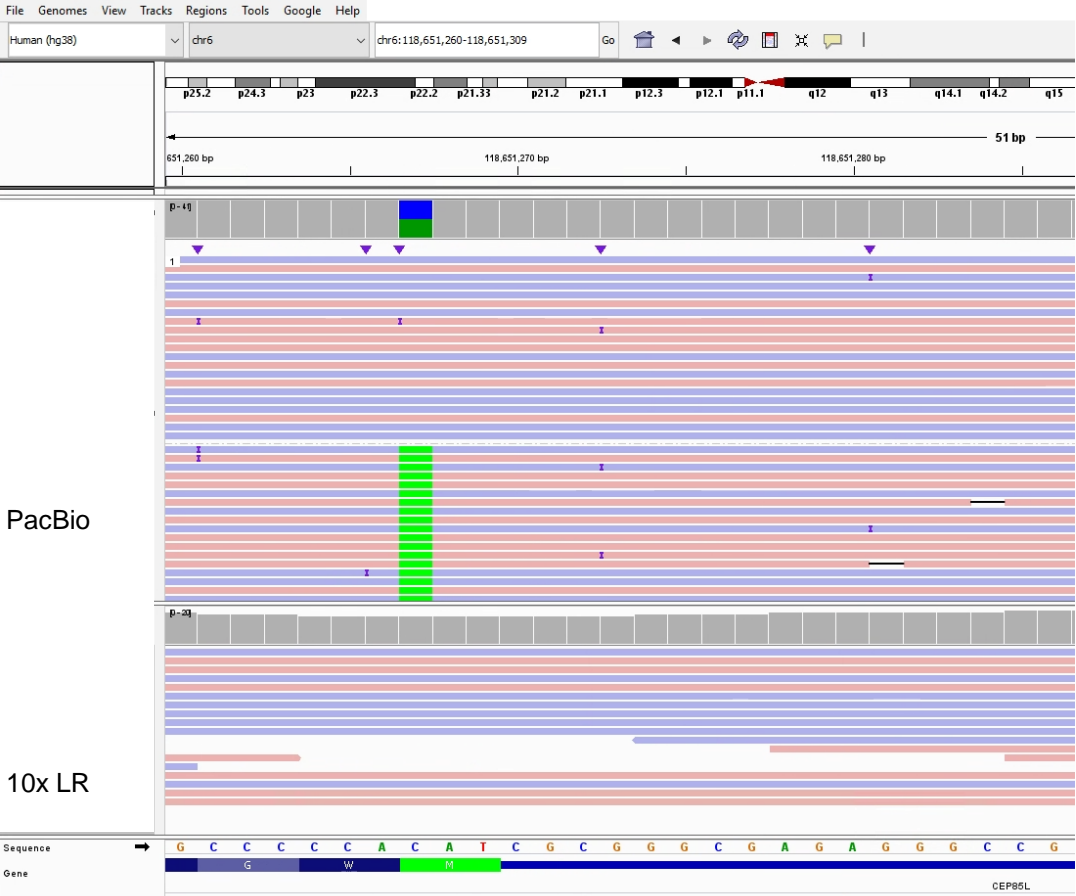

*CEP85L*, NM\_001042475.2: c.3G>T (p.Met1?)

**Supplemental Figure S8.** Family of 791. (a) Pedigree of proband who was referred for failure to thrive, hypotonia, persistent global developmental delays, and epilepsy, with a negative family history. (b) Genome sequencing revealed a deletion of exons 7-8 and part of exon 9 of *CACNA1A*: c.979-354\_1224del, predicted to result in a frameshift and premature stop, consistent with a diagnosis of developmental and epileptic encephalopathy 42 (OMIM 617106).

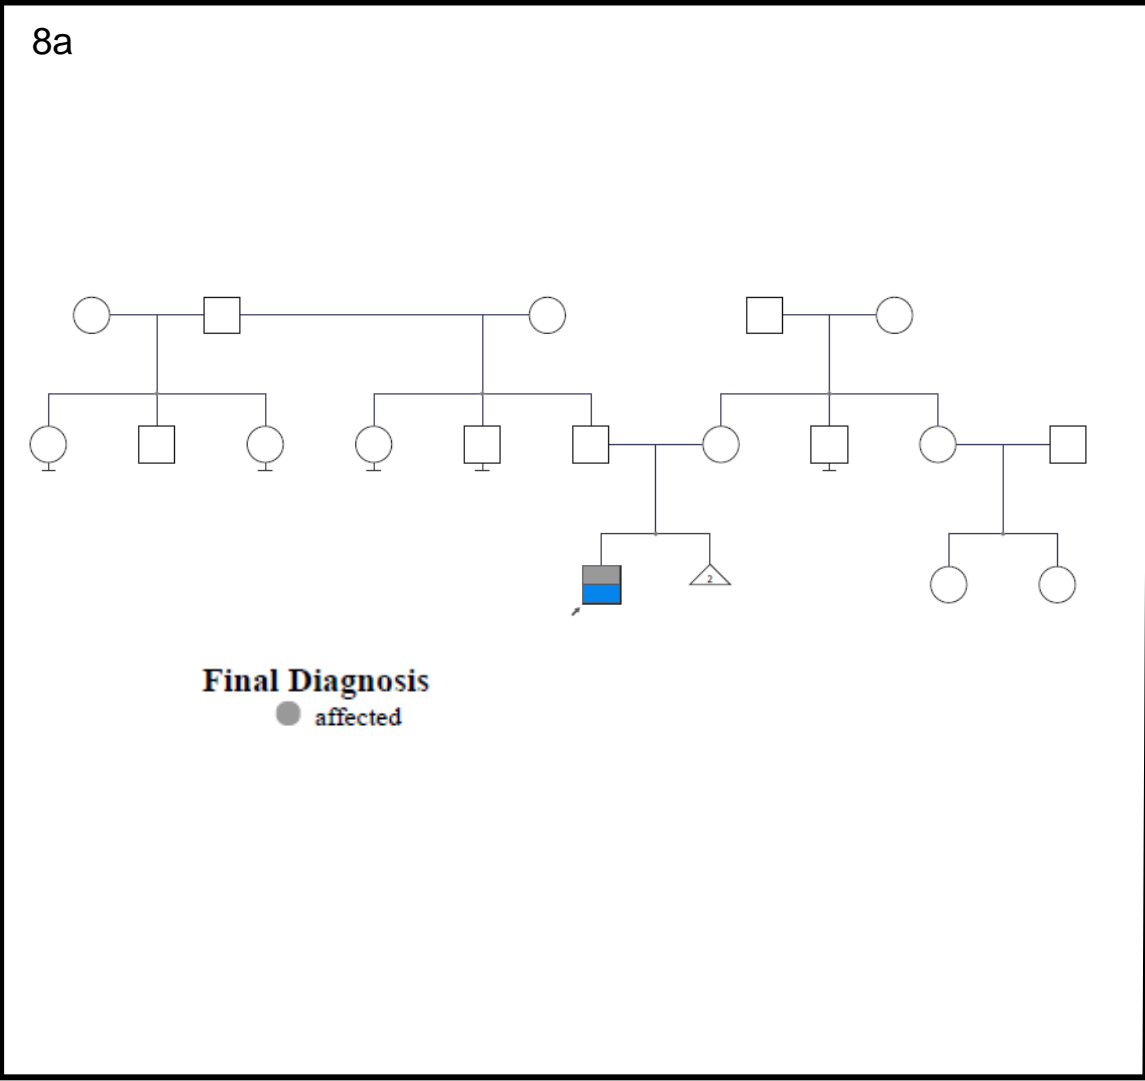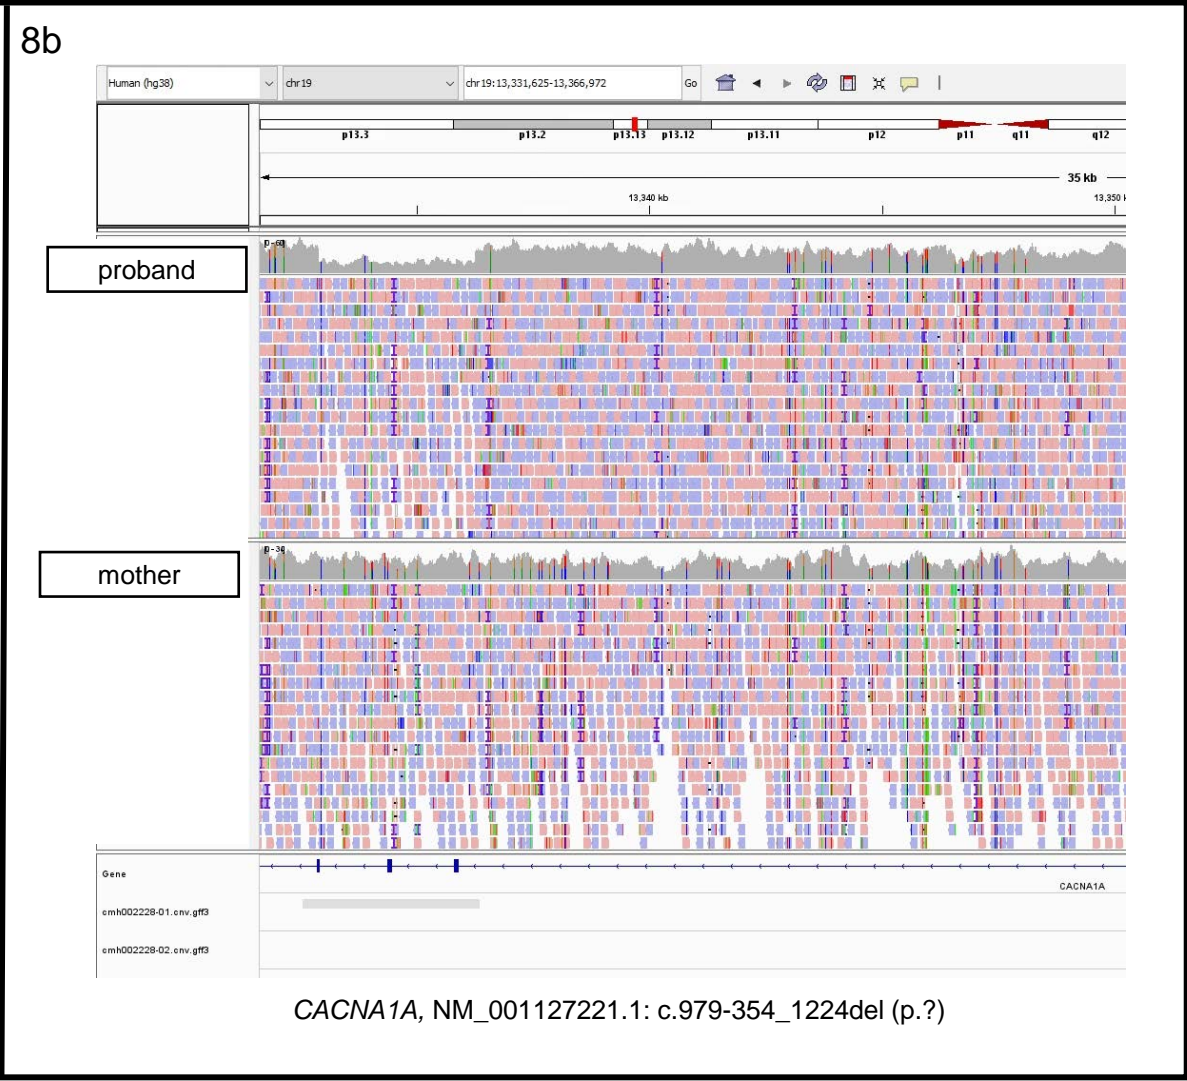

**Supplemental Figure S9. (a)** Sensitivity of SNV calls by technology compared to a truth set of calls from an Illumina genotypic array. 10X Linked read GS consistently had lower sensitivity, although still greater than 95%. **(b)** Specificity of SNV calls by technology compared to a truth set of calls from an Illumina genotypic array.

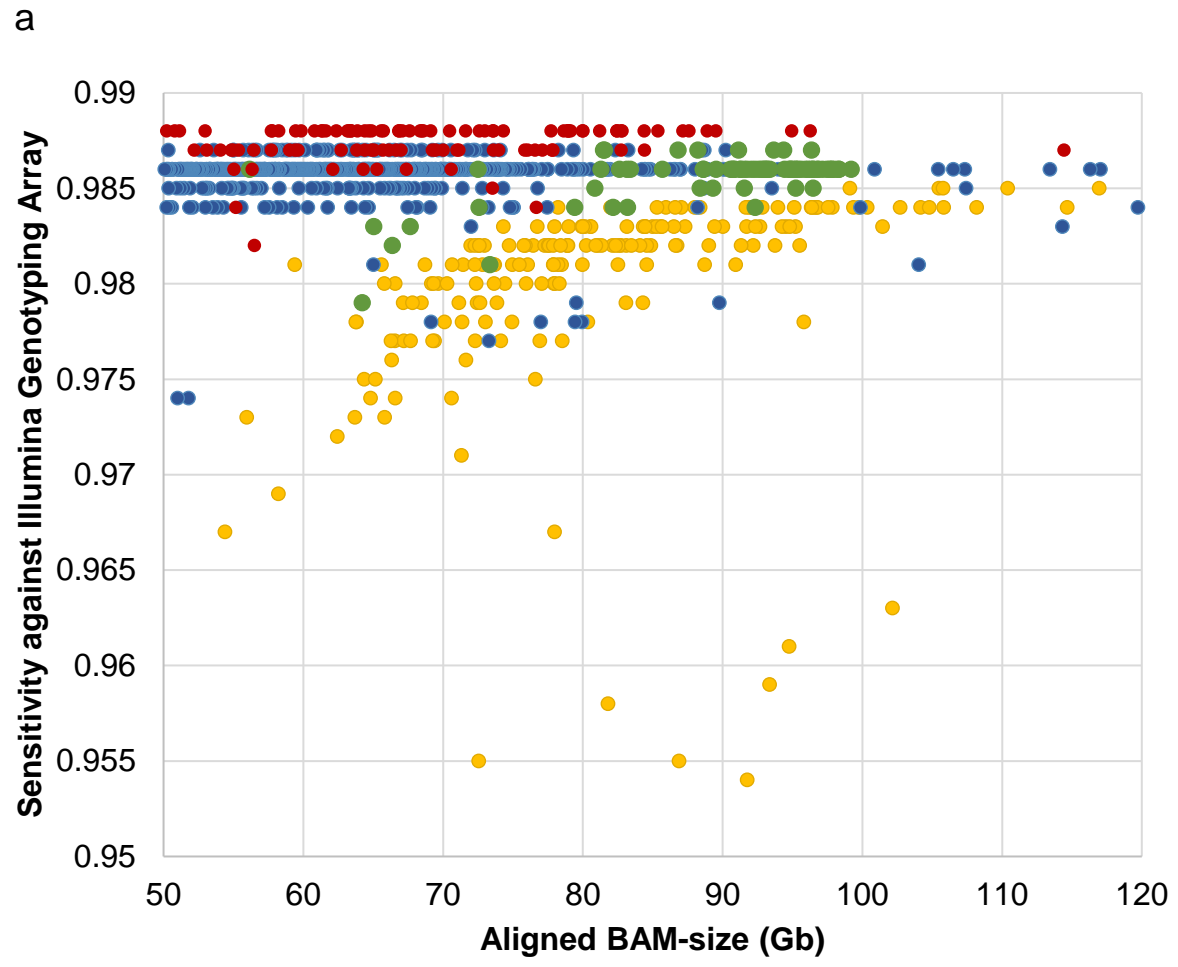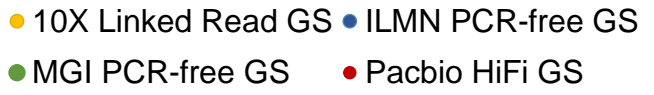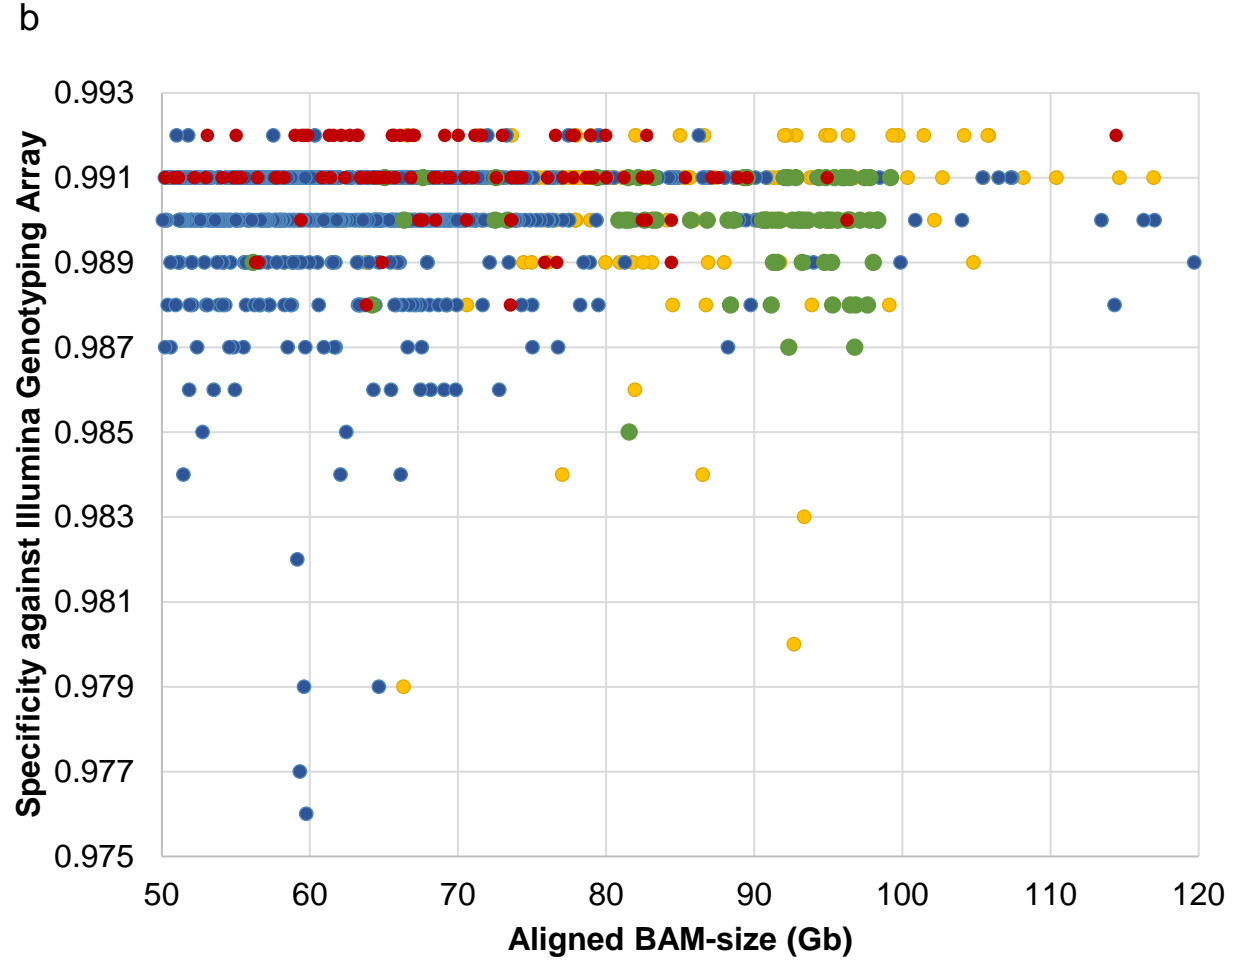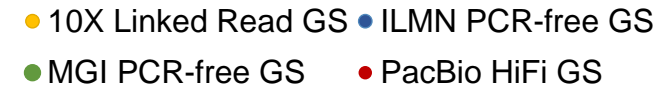

**Supplemental Figure S10.** The average N50 phase block generated from HiFi-GS is 400kb in the first 80 HiFi-GS samples. This can provide accurate phasing information, which is particularly important for patients where parental samples are not available.

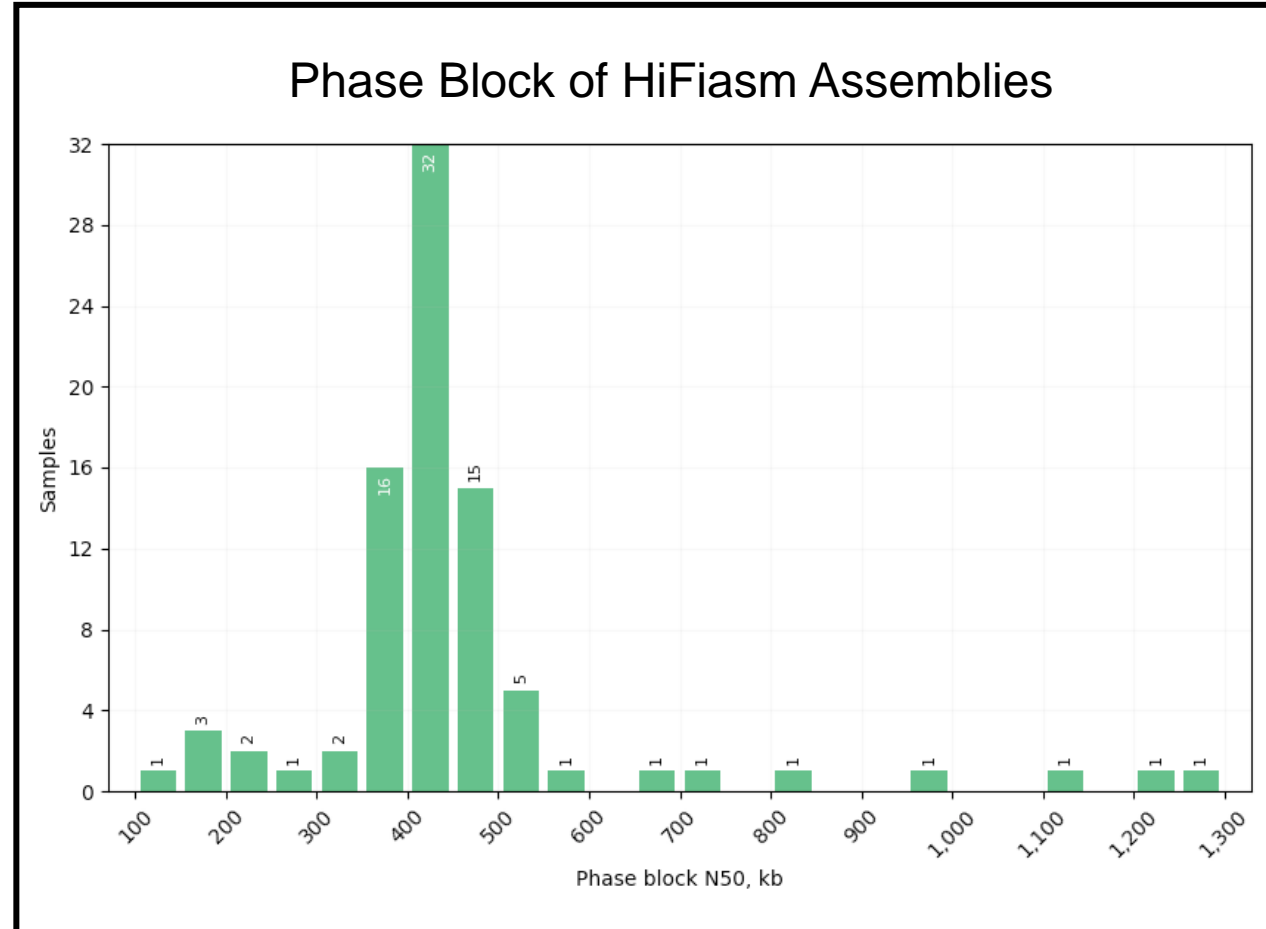

**Supplementary Figure S11.** Cytogenetically-detected apparently balanced translocation, shown to lead to net loss of 1.3Mb in chr2 by PacBio HiFi-GS with a complex structural rearrangement. **(a)** Breakends detected by HiFi-GS **(b)** Graphical representation of structural variation using Ribbon **(c)** Genomic content impacted by SV

**11a**

|            |         |          |      |          |          |   |
|------------|---------|----------|------|----------|----------|---|
| ptg0000191 | 21      | 303894   | chr2 | 15840701 | 16144748 | - |
| ptg0000191 | 303925  | 19379010 | chr9 | 75260460 | 94312900 | + |
| ptg0000491 | 391     | 7102660  | chr2 | 7489537  | 14582268 | + |
| ptg0000491 | 7102670 | 8393768  | chr2 | 67161593 | 68451729 | + |
| ptg0001481 | 8       | 694836   | chr9 | 68220556 | 68915363 | - |
| ptg0001481 | 695521  | 726211   | chr9 | 63809315 | 63838794 | - |
| ptg0001481 | 730706  | 866472   | chr9 | 62822795 | 62958343 | + |
| ptg0001481 | 745559  | 769050   | chr9 | 63759161 | 63782370 | - |
| ptg0001481 | 853425  | 913874   | chr9 | 62822795 | 62883135 | - |
| ptg0001481 | 918369  | 949078   | chr9 | 63809315 | 63838794 | + |
| ptg0001481 | 949763  | 3443669  | chr9 | 68220556 | 70719798 | + |
| ptg0001481 | 3425660 | 7971287  | chr9 | 70719799 | 75260436 | + |
| ptg0001481 | 7971287 | 9230075  | chr2 | 14582291 | 15840687 | + |
| ptg0001481 | 9230087 | 9371741  | chr2 | 67019935 | 67161573 | - |

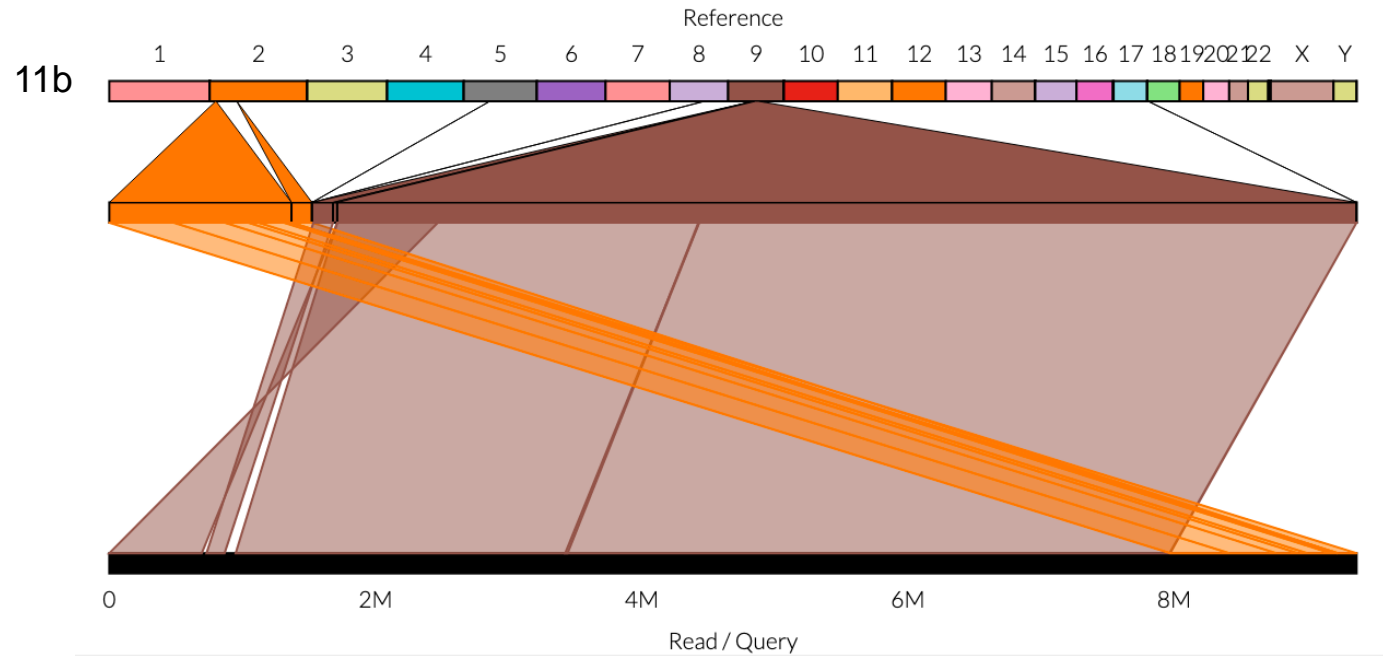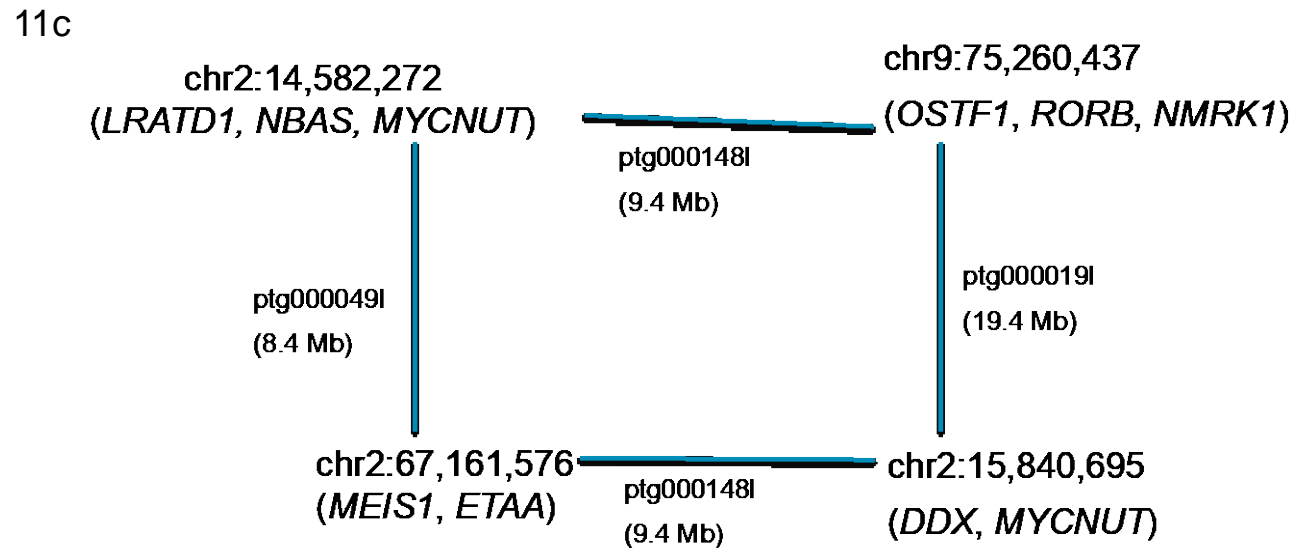

a) Search & Filter

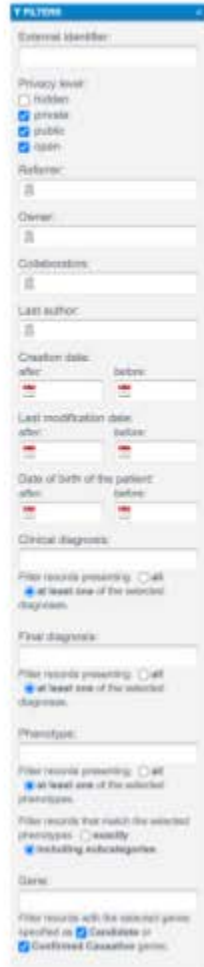

b) Review participant data

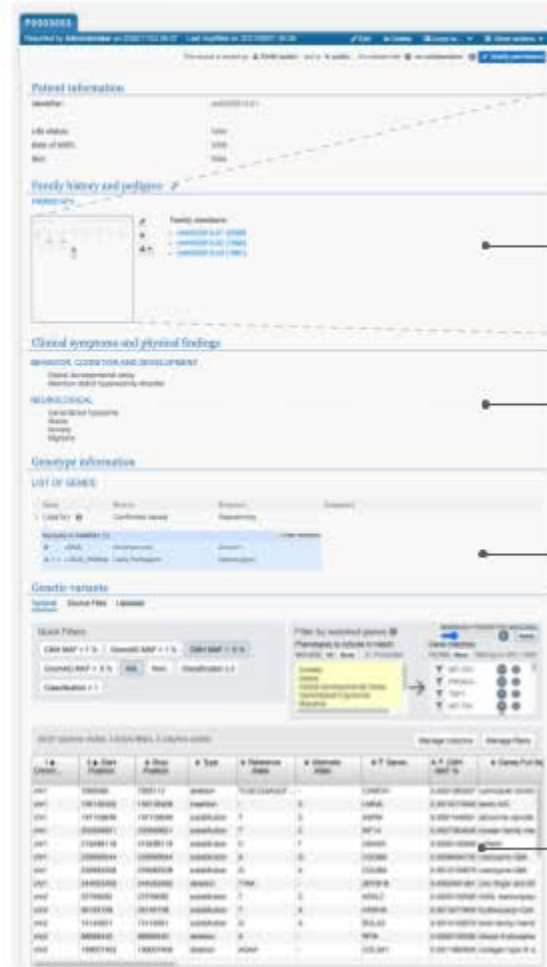

c) Family history, relatives, pedigree

d) Phenotypic features

e) Genetic findings

f) Processed variant data

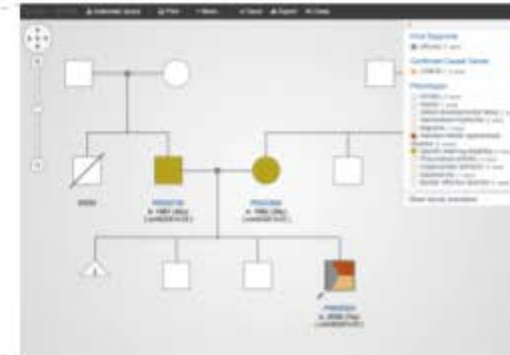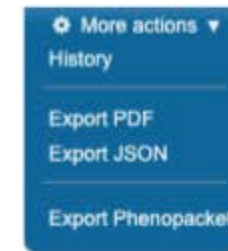

g) Export as Phenopacket
